# Supplementary material for: Relative Contribution of Metabolic Syndrome Components in Relation to Obesity and Insulin Resistance in Postmenopausal Osteoporosis
Source: MDPI journal article supplement (doi:10.3390/jcm13092529), 2024-04-25

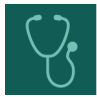

## Supplementary Material

**Table S1. Description of clinical tests for muscular strength and physical performance.** Normal values for each test were obtained from European guidelines EWGSOP-2 [30].

| Description                                                                                                                                                                                                                                                                                                                                                                                                                                                                                                                                           | Normal values                                                                                                                                                                       |
|-------------------------------------------------------------------------------------------------------------------------------------------------------------------------------------------------------------------------------------------------------------------------------------------------------------------------------------------------------------------------------------------------------------------------------------------------------------------------------------------------------------------------------------------------------|-------------------------------------------------------------------------------------------------------------------------------------------------------------------------------------|
| <b>Handgrip strength (HGS)</b> was measured bilaterally using a calibrated digital handheld dynamometer (KERN MAP 80K15) with the patient in a sitting position, the shoulder adducted and neutrally rotated, the elbow against the body, flexed at 90 degrees, and the forearm and wrist in a neutral position. Mean data of three trials are expressed kg.                                                                                                                                                                                          | Values $\geq 16$ kg (EWGSOP-2)                                                                                                                                                      |
| <b>Chair Stand Test (CST)</b> was performed with a standard height chair with a straight back and no armrests and placed next to a wall. Each subject was instructed, at the count of "go," to stand up fully and sit down five times as fast as possible while keeping their arms folded across the chest and without resting on the chair in between repetitions. The patient was not talked during the test to avoid interfering with the patient's speed. The 5xSTS was timed from initial to final seated position and was expressed in seconds. | Values $\leq 15$ sec (EWGSOP-2)                                                                                                                                                     |
| <b>Gait speed (GS)</b> was performed once and assessed over ground at a fast pace using 4-meter straight walking trajectory with a standing start protocol. Timing <sup>a</sup> was started when the first foot movement was observed and was ceased once the subject had completely crossed the end line. Gait speed was expressed in m/s.                                                                                                                                                                                                           | Values $> 0.8$ m/sec (EWGSOP-2)                                                                                                                                                     |
| <b>Timed Up and Go test (TUG)</b> recorded how long it took for a subject to rise from a standard height chair, walk 3 m at a comfortable pace to a mark placed on the floor, turn around, walk back to the starting point, and sit back down on the chair. TUG was expressed in seconds.                                                                                                                                                                                                                                                             | Values $< 20$ sec (EWGSOP-2)                                                                                                                                                        |
| <b>Tinetti Assessment Tool/Test (TT)</b> is a physical performance examination that scores specific gait and balance-related tasks on a three-point ordinal scale with a range of 0 to 2, where 0 represents the most impairment and 2 represents independence.                                                                                                                                                                                                                                                                                       | Maximum score is 28 points (12 for gait and 16 for balance). Subjects below 19 and in the range of 19-24 or 25-28 points are at high and medium risk or low fall risk, respectively |

a, The time was recorded using a digital stopwatch. The participants wore flat-heeled, comfortable shoes and walking aids were permitted but not required since all participants could walk independently.

**Table S2. Additional laboratory features and muscular strength and physical performance in non-OP and OP patients.** Data are presented as mean  $\pm$  SEM. The two groups were compared using Mann-Whitney test for numerical variable and  $\chi^2$  for nominal variable. Summary statistics of muscular tests are indicated in Table 1.

| Parameter                | Non-OP          | Non-OP          | P non-OP/OP |
|--------------------------|-----------------|-----------------|-------------|
| <i>n</i>                 | 68              | 120             |             |
| ESR (mm/h)               | 20.5 $\pm$ 1.4  | 22.7 $\pm$ 3.6  | NS          |
| CRP (mg/dl)              | 0.53 $\pm$ 0.1  | 0.35 $\pm$ 0.0  | 0.039       |
| Fibrinogen (mg/dl)       | 393.6 $\pm$ 8.7 | 368.5 $\pm$ 6.5 | 0.0221      |
| Uric acid (mg/ml)        | 4.9 $\pm$ 0.2   | 4.4 $\pm$ 0.1   | 0.0197      |
| Magnesium (mmol/L)       | 0.089 $\pm$ 0.0 | 0.093 $\pm$ 0.0 | NS          |
| Calcium (mg/dl)          | 4.1 $\pm$ 0.0   | 4.1 $\pm$ 0.0   | NS          |
| Vitamin D (ng/ml)        | 28.2 $\pm$ 1.3  | 29.8 $\pm$ 0.9  | NS          |
| PTH (pg/ml)              | 40.0 $\pm$ 1.8  | 43.4 $\pm$ 1.6  | NS          |
| ALP (U/L)                | 66.3 $\pm$ 2.4  | 65.1 $\pm$ 1.8  | NS          |
| Grip strength Right (kg) | 24.2 $\pm$ 0.7  | 20.9 $\pm$ 0.4  | 0.0001      |
| Grip strength Left (kg)  | 21.8 $\pm$ 0.6  | 18.8 $\pm$ 0.4  | 0.0001      |
| CST (sec)                | 12.7 $\pm$ 0.5  | 15.5 $\pm$ 0.6  | 0.0015      |
| Gait speed (m/sec)       | 1.3 $\pm$ 0.0   | 1.1 $\pm$ 0.0   | 0.0001      |
| TUG (sec)                | 10.1 $\pm$ 0.4  | 12.3 $\pm$ 0.5  | 0.0046      |
| TINETTI test (points)    | 24.2 $\pm$ 0.3  | 23.2 $\pm$ 0.3  | 0.0163      |

a, NS stands for non-significant; ESR, erythrocyte sedimentation rate; CRP, C-reactive protein; CST, Chair Stand Test; TUG, Timed Up and Go.

**Table S3. Features of patients with and without MetS among non-OP and OP populations.** Patients were classified following the AACE definition of osteoporosis in postmenopausal women while severe OP following the WHO criteria. MetS was defined in patients having 3 or more ATP-III criteria. Data are presented as mean  $\pm$  SEM. The two groups were compared using Mann-Whitney test for numerical variables and  $\chi^2$  for nominal variables.

| Parameter                             | Non-OP          |                 |                | OP              |                 |             |
|---------------------------------------|-----------------|-----------------|----------------|-----------------|-----------------|-------------|
|                                       | non-MetS        | MetS            | P <sup>a</sup> | non-MetS        | MetS            | P           |
| <i>n</i>                              | 33              | 35              |                | 83              | 37              |             |
| Age (years)                           | 60.3 $\pm$ 1.6  | 61.0 $\pm$ 1.3  | NS             | 65.7 $\pm$ 0.9  | 67.9 $\pm$ 1.1  | NS          |
| BMI (kg/m <sup>2</sup> )              | 27.4 $\pm$ 0.7  | 33.4 $\pm$ 0.8  | 0.0001         | 24.8 $\pm$ 0.5  | 29.3 $\pm$ 0.8  | 0.0001      |
| Waist (cm)                            | 94.1 $\pm$ 1.7  | 104.4 $\pm$ 1.7 | 0.0001         | 89.8 $\pm$ 1.2  | 98.3 $\pm$ 1.8  | 0.0001      |
| Obesity <sup>BMI</sup> (%)            | 21.2            | 74.3            | 0.0001         | 13.2            | 37.8            | 0.0022      |
| Fasting glucose (mmol/L)              | 5.1 $\pm$ 0.1   | 6.1 $\pm$ 0.2   | 0.0001         | 5.1 $\pm$ 0.1   | 5.9 $\pm$ 0.1   | 0.0001      |
| Fasting insulin ( $\mu$ U/mL)         | 6.9 $\pm$ 0.8   | 12.6 $\pm$ 2.1  | 0.0147         | 6.9 $\pm$ 0.5   | 11.2 $\pm$ 1.2  | 0.0002      |
| HOMA <sub>IR</sub>                    | 1.6 $\pm$ 0.2   | 3.6 $\pm$ 0.7   | 0.0068         | 1.59 $\pm$ 0.1  | 3.0 $\pm$ 0.4   | 0.0001      |
| Insulin resistance (%)                | 15.1            | 54.3            | 0.0007         | 24.1            | 51.3            | 0.0032      |
| SBP (mmHg)                            | 120.6 $\pm$ 1.8 | 130.6 $\pm$ 2.8 | 0.0047         | 117.9 $\pm$ 1.8 | 131.1 $\pm$ 2.9 | 0.0001      |
| DBP (mmHg)                            | 76.8 $\pm$ 1.7  | 78.5 $\pm$ 1.8  | NS             | 73.8 $\pm$ 1.1  | 80.0 $\pm$ 1.8  | 0.0024      |
| HbA1c (%)                             | 5.5 $\pm$ 0.1   | 5.9 $\pm$ 0.1   | 0.0084         | 5.4 $\pm$ 0.0   | 5.8 $\pm$ 0.0   | 0.0001      |
| TG (mmol/L)                           | 0.93 $\pm$ 0.0  | 1.5 $\pm$ 0.1   | 0.0001         | 1.0 $\pm$ 0.0   | 1.4 $\pm$ 0.1   | 0.0001      |
| HDL-cholesterol (mmol/L)              | 1.7 $\pm$ 0.0   | 1.4 $\pm$ 0.1   | 0.0004         | 1.6 $\pm$ 0.0   | 1.4 $\pm$ 0.0   | 0.0079      |
| Central obesity (%)                   | 75.7            | 97.1            | 0.0093         | 56.6            | 91.8            | 0.0001 (NA) |
| Hyperglycemia (%)                     | 9.4             | 68.6            | 0.0001         | 16.8            | 75.7            | 0.0001 (NA) |
| Hypertension (%)                      | 34.3            | 80.0            | 0.0002         | 25.3            | 75.9            | 0.0001 (NA) |
| High TG (%)                           | 3.1             | 31.4            | 0.0025         | 9.6             | 37.8            | 0.0007 (NA) |
| Low HDL (%)                           | 9.4             | 74.3            | 0.0001         | 16.8            | 59.4            | 0.0001 (NA) |
| Osteopenia (%)                        | 66.6            | 37.1            | 0.03           | 3.6             | 0.0             | NA          |
| Severe-OP with fractures (%)          | NA              | NA              | NA             | 48.1            | 48.6            | NS          |
| BMD Lumbar spine (g/cm <sup>2</sup> ) | 1.0 $\pm$ 0.0   | 1.1 $\pm$ 0.0   | 0.0331         | 0.83 $\pm$ 0.0  | 0.92 $\pm$ 0.0  | 0.0013      |
| BMD Hip (g/cm <sup>2</sup> )          | 0.9 $\pm$ 0.0   | 1.1 $\pm$ 0.0   | 0.0001         | 0.79 $\pm$ 0.0  | 0.86 $\pm$ 0.0  | 0.0038      |
| BMD Femoral neck (g/cm <sup>2</sup> ) | 0.9 $\pm$ 0.0   | 1.0 $\pm$ 0.0   | 0.0023         | 0.74 $\pm$ 0.0  | 0.78 $\pm$ 0.0  | 0.0476      |
| BMD Radius 33% (g/cm <sup>2</sup> )   | 0.52 $\pm$ 0.0  | 0.51 $\pm$ 0.0  | NS             | 0.58 $\pm$ 0.0  | 0.59 $\pm$ 0.0  | NS          |
| TBS L1 – L4                           | 1.22 $\pm$ 0.0  | 1.22 $\pm$ 0.0  | NS             | 1.25 $\pm$ 0.0  | 1.23 $\pm$ 0.0  | NS          |
| Osteocalcin (ng/ml)                   | 21.4 $\pm$ 1.6  | 18.8 $\pm$ 3.3  | NS             | 14.5 $\pm$ 1.3  | 16.4 $\pm$ 1.2  | NS          |
| P1NP (ng/ml)                          | 46.1 $\pm$ 4.1  | 42.1 $\pm$ 8.4  | NS             | 34.4 $\pm$ 4.9  | 44.9 $\pm$ 4.5  | 0.06        |
| Beta-crosslaps (ng/ml)                | 0.39 $\pm$ 0.0  | 0.40 $\pm$ 0.1  | NS             | 0.31 $\pm$ 0.0  | 0.3 $\pm$ 0.0   | NS          |
| SUM <sup>stat</sup> muscle (%)        | 41.6            | 50.0            | NS             | 43.5            | 52.2            | NS          |
| Grip strength Right (kg)              | 20.39 $\pm$ 0.7 | 22.1 $\pm$ 1.1  | NS             | 20.4 $\pm$ 0.9  | 20.8 $\pm$ 0.8  | NS          |
| Grip strength Left (kg)               | 18.4 $\pm$ 0.6  | 19.5 $\pm$ 0.9  | NS             | 19.1 $\pm$ 0.9  | 18.9 $\pm$ 0.9  | NS          |
| TUG (sec)                             | 12.7 $\pm$ 0.9  | 11.2 $\pm$ 1.1  | NS             | 12.2 $\pm$ 0.8  | 12.2 $\pm$ 0.8  | NS          |

a, NS stands for non-significant and NA for non-applicable; MetS, Metabolic syndrome; P1NP, Procollagen type I N-terminal propeptide; TBS, trabecular bone score; SUM<sup>stat</sup> muscle, summary statistics of muscular tests as described in Patients and methods section.

**Table S4.** Features of patients with OP stratified as lean and overweight/obese using the cutoff of 27.2 kg/m<sup>2</sup>. Data are presented as mean  $\pm$  SEM. The two groups were compared using Mann-Whitney test numerical variables and  $\chi^2$  for nominal variables.

| Parameter                             | Lean<br>BMI 21-27.2 kg/m <sup>2</sup> | OW / OB<br>BMI 27.2 -35.5 kg/m <sup>2</sup> | P<br>Lean-OW/OB-OP |
|---------------------------------------|---------------------------------------|---------------------------------------------|--------------------|
| <i>n</i>                              | 74                                    | 46                                          |                    |
| Age (years)                           | 66.1 $\pm$ 1.0                        | 66.7 $\pm$ 1.0                              | NS                 |
| BMI (kg/m <sup>2</sup> )              | 23.1 $\pm$ 0.3                        | 31.3 $\pm$ 0.4                              | 0.0001             |
| Waist (cm)                            | 86.4 $\pm$ 1.0                        | 101.9 $\pm$ 1.3                             | 0.0001             |
| Obesity (%)                           | 0.0                                   | 54.3                                        | 0.0001             |
| Fasting glucose (mmol/L)              | 5.2 $\pm$ 0.1                         | 5.7 $\pm$ 0.1                               | 0.0017             |
| Fasting insulin ( $\mu$ U/mL)         | 6.5 $\pm$ 0.5                         | 11.2 $\pm$ 1.0                              | 0.0001             |
| HbA1c (%)                             | 5.4 $\pm$ 0.0                         | 5.7 $\pm$ 0.0                               | 0.0014             |
| HOMA <sub>IR</sub>                    | 1.52 $\pm$ 0.1                        | 2.9 $\pm$ 0.3                               | 0.0001             |
| Insulin resistance (%)                | 20.3                                  | 52.2                                        | 0.0002             |
| SBP (mmHg)                            | 118.9 $\pm$ 2.1                       | 127.0 $\pm$ 2.3                             | 0.0149             |
| DBP (mmHg)                            | 74.3 $\pm$ 1.2                        | 78.2 $\pm$ 1.5                              | 0.0471             |
| Triglycerides (mmol/L)                | 1.1 $\pm$ 0.0                         | 1.2 $\pm$ 0.1                               | 0.07 NS            |
| HDL-cholesterol (mmol/L)              | 1.6 $\pm$ 0.0                         | 1.4 $\pm$ 0.4                               | NS                 |
| Central obesity (%)                   | 50.0                                  | 95.6                                        | 0.0001             |
| Hyperglycemia (%)                     | 74.3                                  | 50.0                                        | 0.006              |
| Hypertension (%) <sup>c</sup>         | 66.6                                  | 50.0                                        | NS                 |
| High Triglycerides (%)                | 14.9                                  | 21.7                                        | NS                 |
| Low HDL (%)                           | 21.6                                  | 35.5                                        | NS                 |
| MetS <sup>ATPIII</sup> (%)            | 18.9                                  | 50.0                                        | 0.0003             |
| CRP (mg/dl)                           | 0.3 $\pm$ 0.0                         | 0.4 $\pm$ 0.1                               | NS 0.07            |
| ESR (mm/h)                            | 19.5 $\pm$ 1.2                        | 27.7 $\pm$ 9.0                              | NS                 |
| Fibrinogen (mg/dl)                    | 358.7 $\pm$ 8.3                       | 384.9 $\pm$ 10.2                            | NS                 |
| BMD Hip (g/cm <sup>2</sup> )          | 0.8 $\pm$ 0.0                         | 0.9 $\pm$ 0.0                               | 0.0001             |
| BMD Femoral neck (g/cm <sup>2</sup> ) | 0.7 $\pm$ 0.0                         | 0.8 $\pm$ 0.0                               | 0.0002             |
| BMD Lumbar spine (g/cm <sup>2</sup> ) | 0.8 $\pm$ 0.0                         | 0.9 $\pm$ 0.0                               | 0.0001             |
| BMD Radius 1/3 (g/cm <sup>2</sup> )   | 0.5 $\pm$ 0.0                         | 0.6 $\pm$ 0.0                               | 0.0001             |
| TBS L1 – L4                           | 1.2 $\pm$ 0.0                         | 1.2 $\pm$ 0.0                               | NS                 |
| Severe OP with Fractures (%)          | 48.6                                  | 47.8                                        | NS                 |
| Osteocalcin (ng/ml)                   | 20.8 $\pm$ 1.4                        | 15.4 $\pm$ 0.9                              | 0.0075             |
| SUM <sup>stat</sup> muscle (%)        | 43.2                                  | 47.8                                        | NS                 |

**Table S5. Features of patients with simple and severe OP with fragility fractures.** Data are presented as mean  $\pm$  SEM. The two groups were compared using Mann-Whitney test numerical variables and  $\chi^2$  for nominal variables.

| Parameter                             | Non-OP          | Non-OP          | P<br>non-OP/OP |
|---------------------------------------|-----------------|-----------------|----------------|
| n                                     | 62              | 58              |                |
| Age (years)                           | 65.4 $\pm$ 1.0  | 67.4 $\pm$ 1.0  | NS             |
| BMI (kg/m <sup>2</sup> )              | 26.6 $\pm$ 0.7  | 25.8 $\pm$ 0.6  | NS             |
| Waist (cm)                            | 92.8 $\pm$ 1.4  | 91.8 $\pm$ 1.6  | NS             |
| Obesity (%)                           | 26.7            | 10.0            | NS             |
| Overweight (%)                        | 17              | 28              | 0.05           |
| OW/OB (%)                             | 38.7            | 37.9            | NS             |
| Fasting glucose (mmol/L)              | 5.4 $\pm$ 0.1   | 5.3 $\pm$ 0.1   | NS             |
| Fasting insulin ( $\mu$ U/mL)         | 8.9 $\pm$ 0.9   | 7.7 $\pm$ 0.7   | NS             |
| HbA1c                                 | 5.5 $\pm$ 0.0   | 5.5 $\pm$ 0.0   | NS             |
| HOMA <sub>IR</sub>                    | 2.3 $\pm$ 0.3   | 1.8 $\pm$ 0.2   | NS             |
| Insulin resistance (%)                | 30.6            | 34.4            | NS             |
| SBP (mmHg)                            | 119.4 $\pm$ 2.4 | 125.1 $\pm$ 2.1 | NS             |
| DBP (mmHg)                            | 74.9 $\pm$ 1.4  | 76.7 $\pm$ 1.2  | NS             |
| Triglycerides (mmol/L)                | 1.2 $\pm$ 0.1   | 1.0 $\pm$ 0.0   | NS             |
| HDL-cholesterol (mmol/L)              | 1.5 $\pm$ 0.0   | 1.6 $\pm$ 0.0   | NS             |
| Central obesity (%)                   | 65.3            | 70.0            | NS             |
| Hyperglycemia (%)                     | 36.0            | 27.5            | NS             |
| Hypertension (%)                      | 32.0            | 52.7            | NS             |
| High Triglycerides (%)                | 21.3            | 15.0            | NS             |
| Low HDL-C (%)                         | 29.3            | 30.0            | NS             |
| MetS <sup>ATPIII</sup> (%)            | 30.6            | 31.0            | NS             |
| CRP (mg/dl)                           | 0.37 $\pm$ 0.1  | 0.3 $\pm$ 0.0   | NS             |
| ESR (mm/h)                            | 26.3 $\pm$ 6.9  | 18.9 $\pm$ 1.5  | NS             |
| Fibrinogen (mg/dl)                    | 372.3 $\pm$ 9.6 | 364.3 $\pm$ 8.7 | NS             |
| BMD Hip (g/cm <sup>2</sup> )          | 0.84 $\pm$ 0.0  | 0.79 $\pm$ 0.0  | 0.0164         |
| BMD Femoral neck (g/cm <sup>2</sup> ) | 0.78 $\pm$ 0.0  | 0.73 $\pm$ 0.0  | 0.0029         |
| BMD Lumbar spine (g/cm <sup>2</sup> ) | 0.88 $\pm$ 0.0  | 0.83 $\pm$ 0.0  | 0.058          |
| BMD Radius 1/3 (g/cm <sup>2</sup> )   | 0.55 $\pm$ 0.0  | 0.54 $\pm$ 0.0  | NS             |
| TBS L1 – L4                           | 1.2 $\pm$ 0.0   | 1.2 $\pm$ 0.0   | NS             |
| Calcium (mg/dl)                       | 4.1 $\pm$ 0.0   | 4.1 $\pm$ 0.0   | NS             |
| (25-OH) Vitamin D (ng/ml)             | 29.1 $\pm$ 1.4  | 30.6 $\pm$ 1.2  | NS             |
| PTH (pg/ml)                           | 42.6 $\pm$ 2.4  | 44.2 $\pm$ 2.2  | NS             |
| ALP (U/L)                             | 63.1 $\pm$ 2.3  | 67.2 $\pm$ 2.9  | NS             |
| Osteocalcin (ng/ml)                   | 17.7 $\pm$ 1.1  | 20.0 $\pm$ 1.7  | NS             |
| P1NP (ng/ml)                          | 39.1 $\pm$ 3.0  | 47.5 $\pm$ 4.3  | NS             |
| Beta-crosslaps (ng/ml)                | 0.33 $\pm$ 0.0  | 0.41 $\pm$ 0.0  | NS             |
| Grip strength Right (kg)              | 21.6 $\pm$ 0.5  | 20.3 $\pm$ 0.6  | NS             |
| Grip strength Left (kg)               | 19.4 $\pm$ 0.5  | 18.0 $\pm$ 0.5  | NS             |
| CST (sec)                             | 14.7 $\pm$ 0.7  | 16.3 $\pm$ 0.9  | NS             |
| Gait speed (m/sec)                    | 1.1 $\pm$ 0.0   | 1.0 $\pm$ 0.0   | NS             |
| TUG (sec)                             | 11.3 $\pm$ 0.5  | 13.4 $\pm$ 0.9  | 0.0530         |
| TINETTI test (points)                 | 23.5 $\pm$ 0.3  | 22.9 $\pm$ 0.4  | NS             |
| Cumulative abnormal muscle tests (%)  |                 |                 |                |
| 1                                     | 61.3            | 42.5            | NS             |
| 2                                     | 26.7            | 40.0            | NS             |
| 3                                     | 9.3             | 10.0            | NS             |
| 4                                     | 1.3             | 7.5             | NS             |
| SUM <sup>stat</sup> muscle            | 37.3            | 57.5            | NS             |
| Beta-crosslaps (ng/ml)                | 0.33 $\pm$ 0.0  | 0.41 $\pm$ 0.0  | NS             |
| Grip strength Right (kg)              | 21.6 $\pm$ 0.5  | 20.3 $\pm$ 0.6  | NS             |
| Grip strength Left (kg)               | 19.4 $\pm$ 0.5  | 18.0 $\pm$ 0.5  | NS             |
| CST (sec)                             | 14.7 $\pm$ 0.7  | 16.3 $\pm$ 0.9  | NS             |

Fig S1. Correlation between BMD at the 1/3 of radius and cumulative criteria for MetS.

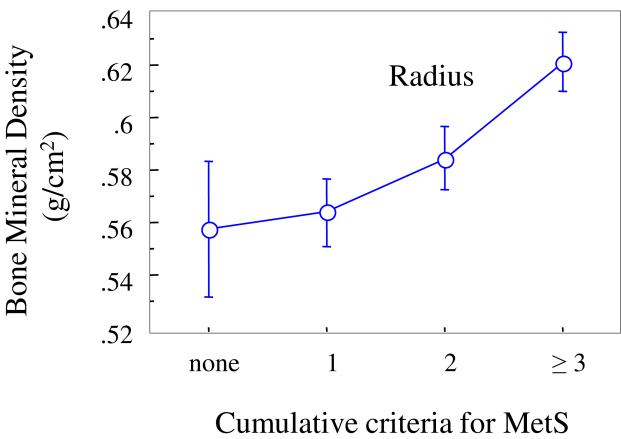

Fig. S2 Residuals of BMD values at femoral neck and hip anatomical sites as function of the degree of obesity. Categories A to F correspond to centiles of BMI in the entire populations (non-OP and OP). Residuals were obtained by subtraction of predicted values of BMD based on regression in non-OP patients from genuine values. Bars indicate the SEM.

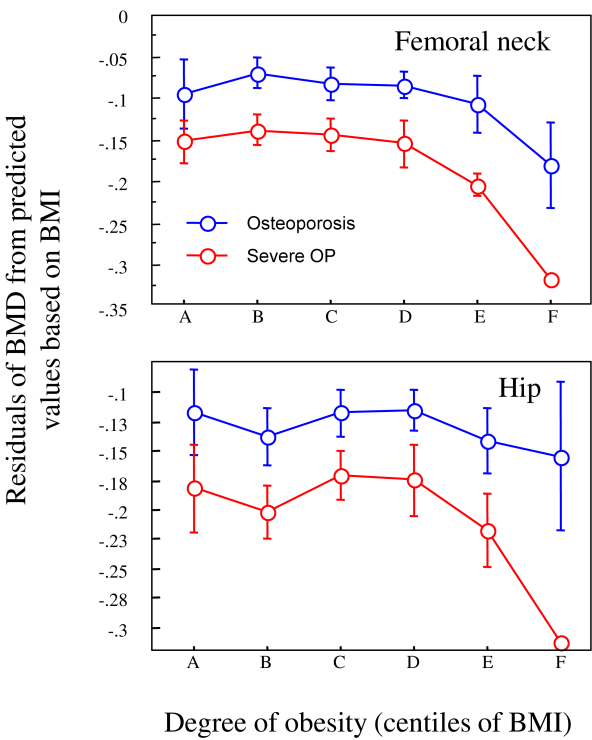

Supplement: s1 [file s1]
